# Supplementary material for: Effects of collagen hydrolysates on UV-induced photoaging mice: Gly-Pro-Hyp as a potent anti-photoaging peptide
Source: Royal Society of Chemistry journal article supplement (doi:10.1039/d3fo04949c), 2024-01-01
Supplement: d3fo04949c1.pdf [file d3fo04949c1.pdf]

# Effects of Collagen Hydrolysates on UV-induced Photoaging Mice: Gly-Pro-Hyp as a Potent Anti-photoaging Peptide

Danyin Yang<sup>†</sup>, Qi Liu<sup>†</sup>, Qiongyao Xu<sup>†</sup>, Lin Zheng<sup>†</sup>, Silu Zhang<sup>‡</sup>, Shan Lu<sup>‡</sup>, Guoxun Xiao<sup>‡\*</sup>,

Mouming Zhao<sup>†\*</sup>

<sup>†</sup>School of Food Science and Engineering, South China University of Technology,

Guangzhou 510640, China

<sup>‡</sup>Shenzhen Porshealth Bioengineering Co., Ltd., Shenzhen 518116, China

\*Corresponding author

Mouming Zhao

Tel/Fax: +86 20 87113914

E-mail: femmzhao@scut.edu.cn

Guoxun Xiao

Tel/Fax: +86 0755 85218848

E-mail: shawn@wonderlab.top

**Table S1. MRM Transitions in Identification and Quantification of Peptides in****Rats Plasma**

| <b>Amino acid and peptides</b> | <b>Q1/(m/z)</b> | <b>Precursor type</b> | <b>Q3/(m/z)</b> | <b>DP/V</b> | <b>CE/V</b> |
|--------------------------------|-----------------|-----------------------|-----------------|-------------|-------------|
| Hyp                            | 132.1           | [M+H] <sup>+</sup>    | 86.1            | 30          | 20          |
| Leu-Hyp                        | 245.1           | [M+H] <sup>+</sup>    | 132.1           | 53          | 19          |
| Phe-Hyp                        | 279.1           | [M+H] <sup>+</sup>    | 132.1           | 67          | 20          |
| Pro-Hyp                        | 229.1           | [M+H] <sup>+</sup>    | 132.1           | 47          | 18          |
| Hyp-Gly                        | 189.1           | [M+H] <sup>+</sup>    | 86.1            | 50          | 22          |
| Gly-Pro-Hyp                    | 286.1           | [M+H] <sup>+</sup>    | 127.1           | 70          | 22          |
| Ala-Hyp-Gly                    | 260.1           | [M+H] <sup>+</sup>    | 189.1           | 45          | 18          |
| Leu-Hyp-Gly                    | 302.2           | [M+H] <sup>+</sup>    | 189.1           | 66          | 22          |
| Ser-Hyp-Gly                    | 276.1           | [M+H] <sup>+</sup>    | 189.1           | 48          | 20          |

Notes: Q1, Q3, DP, and CE represent the precursor ion, the product ion, the declustering potential, and the collision energy, respectively. Peptide sequences are abbreviated with the three-letter amino acid code. Hyp represents hydroxyproline.

**Table S2. Free Amino Acid Composition of the Collagen Hydrolysates with Lower Content of Gly-Pro-Xaa Tripeptides (LCH) and Higher Content of Gly-Pro-Xaa Tripeptides (HCH)**

| <b>Amino acid</b>   | <b>LCH (mg/g)</b>  | <b>HCH (mg/g)</b> |
|---------------------|--------------------|-------------------|
| Aspartic acid (Asp) | 1.54±0.21          | 0.19±0.01         |
| Threonine (Thr)     | 8.16±0.51          | 0.15±0.01         |
| Serine (Ser)        | 4.34±0.01          | 0.57±0.04         |
| Glutamic acid (Glu) | 2.87±0.35          | 0.46±0.05         |
| Glycine (Gly)       | 11.9±0.47          | 0.15±0.01         |
| Alanine (Ala)       | 17.42±0.41         | 2.61±0.01         |
| Cysteine (Cys)      | 1.1±0.34           | Not detected      |
| Valine (Val)        | 11.2±0.19          | 2.54±0.08         |
| Methionine (Met)    | 5.89±0.29          | 4.1±0.17          |
| Isoleucine (Ile)    | 9.15±0.25          | 0.1±0.01          |
| Leucine (Leu)       | 13.6±0.14          | 11.29±0.16        |
| Phenylalanine (Phe) | 29.22±0.84         | 25.82±0.97        |
| Lysine (Lys)        | 8.71±0.18          | 6.36±0.43         |
| Histidine (His)     | 2.96±0.32          | 6.06±0.32         |
| Arginine (Arg)      | 23.1±0.34          | 1.02±0.08         |
| Proline (Pro)       | 1.47±0.27          | 0.4±0.05          |
| <b>Total</b>        | <b>152.64±5.12</b> | <b>61.82±2.22</b> |

**Table S3. Targets Enriched in the Pathways with Top 10 -Log(P Value) in KEGG****Pathway Analysis**

| <b>Pathway</b>                                         | <b>-Log(P Value)</b> | <b>Count</b> | <b>Targets</b>                                       |
|--------------------------------------------------------|----------------------|--------------|------------------------------------------------------|
| Apoptosis                                              | 7.812081             | 8            | JUN, CASP8, CTSL, CASP3, GZMB,<br>FOS, CTSD, CTSB    |
| IL-17 signaling<br>pathway                             | 5.685795             | 6            | JUN, CASP8, CASP3, MMP3, FOS,<br>PTGS2               |
| TNF signaling<br>pathway                               | 5.271478             | 6            | JUN, CASP8, CASP3, MMP3, FOS,<br>PTGS2               |
| Pathways in cancer                                     | 3.857512             | 8            | ITGB1, CCNA2, JUN, CASP8,<br>CASP3, MMP2, FOS, PTGS2 |
| Estrogen signaling<br>pathway                          | 3.572739             | 5            | JUN, MMP2, PRKCD, FOS, CTSD                          |
| Hepatitis B                                            | 3.307209             | 5            | CCNA2, JUN, CASP8, CASP3, FOS                        |
| Pertussis                                              | 3.148507             | 4            | ITGB1, JUN, CASP3, FOS                               |
| Leishmaniasis                                          | 3.131903             | 4            | ITGB1, JUN, FOS, PTGS2                               |
| Kaposi sarcoma-<br>associated herpesvirus<br>infection | 3.012531             | 5            | JUN, CASP8, CASP3, FOS, PTGS2                        |
| Pathogenic<br>Escherichia coli<br>infection            | 2.987651             | 5            | ITGB1, JUN, CASP8, CASP3, FOS                        |

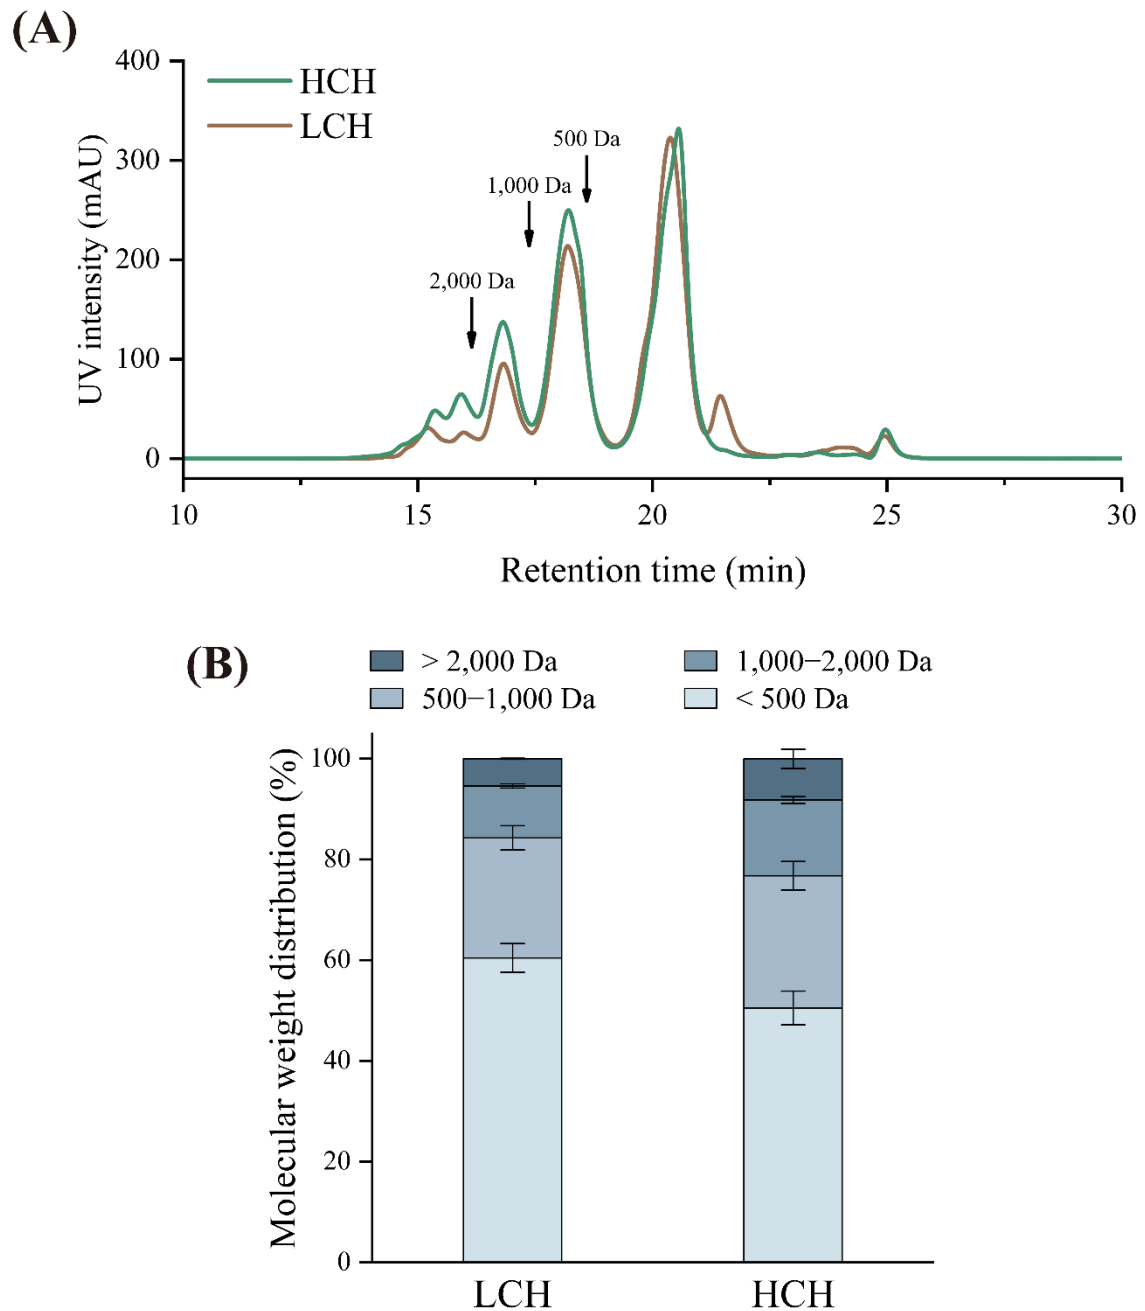

**Figure S1.** Chromatogram of collagen hydrolysates with lower content of Gly-Pro-Xaa tripeptides (LCH) and higher content of Gly-Pro-Xaa tripeptides (HCH) by size exclusion chromatography using a TSKgel G2000 SWXL analytical column (GEL LOT 502R) (300 mm × 7.8 mm) (A). Molecular weight distribution of components in LCH and HCH (B).

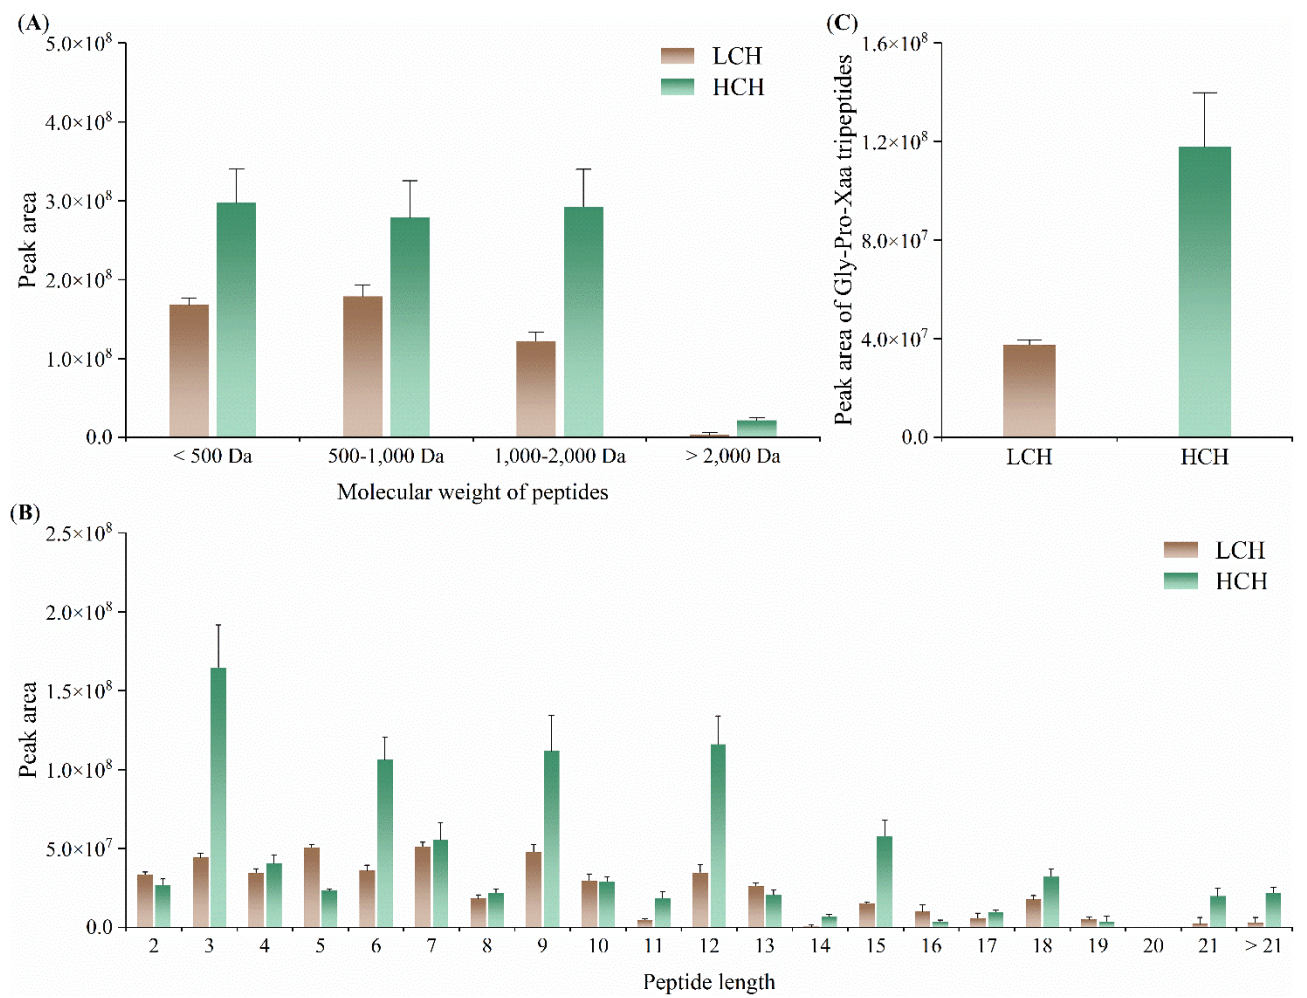

**Figure S2.** Peak area of peptides with peak intensity  $> 5 \times 10^4$  in LCH and HCH according to molecular weight (A) and length (B). Column diagram of peak area of Gly-Pro-Xaa tripeptides in LCH and HCH (C).
